# Supplementary material for: Peroxynitrite Generation and Increased Heterotrophic Capacity Are Linked to the Disruption of the Coral–Dinoflagellate Symbiosis in a Scleractinian and Hydrocoral Species
Source: MDPI journal article supplement (doi:10.3390/microorganisms7100426), 2019-10-09
Supplement: s1 [file s1]

## Supplementary material

Table 1. Autofluorescence data detected at Ex/Em = 490/530nm (fluorescence/mg protein, mean  $\pm$  SEM, N = 6) of two coral species, the scleractinian *Mussismilia harttii* and the hydrocoral *Millepora alcicornis*, before (samples collected from December to March) and during thermal stress (April to June), and their statistical descriptors. No significant differences in fluorescence between thermal stressed and non-stressed corals, for each species, were indicated by Student's t-test.

| Species               | Condition             |                       | Statistical descriptors |       |         |
|-----------------------|-----------------------|-----------------------|-------------------------|-------|---------|
|                       | Before thermal stress | During thermal stress | df                      | t     | p-value |
| <i>Mi. alcicornis</i> | 4172.9 $\pm$ 835.5    | 3511.8 $\pm$ 595.2    | 10                      | 0.64  | 0.534   |
| <i>Mu. harttii</i>    | 20522.1 $\pm$ 3347.8  | 20963.4 $\pm$ 6552.8  | 10                      | -0.06 | 0.953   |
